# Supplementary material for: Background fish feminization effects in European remote sites
Source: PubMed Central journal article supplement (PMC4462152; doi:10.1038/srep11292), 2015-06-10
Supplement: srep11292-s1.pdf [file srep11292-s1.pdf]

## **Supplementary information**

### **Background fish feminization effects in European remote sites**

Sergio Jarque<sup>1</sup>, Laia Quirós<sup>1</sup>, Joan O. Grimalt<sup>1\*</sup>, Eva Gallego<sup>1</sup>, Jordi Catalan<sup>2</sup>, Reinhard Lackner<sup>3</sup>, Benjamin Piña<sup>1</sup>.

<sup>1</sup>Institute of Environmental Assessment and Water Research (IDÆA-CSIC). Jordi Girona, 18. 08034 Barcelona, Catalonia, Spain, <sup>2</sup>CREAF. Edifici C, Campus de Bellaterra. Autonomous University of Barcelona. 08193 Cerdanyola del Vallès, Catalonia, Spain, <sup>3</sup>Institute of Zoology, University of Innsbruck, Technikerstrasse 25, Innsbruck, A-6020, Austria. \*e-mail: joan.grimalt@idaea.csic.es



Table S2. Spearman rank correlations ( $\rho$ ) between hepatic mRNA levels for different genes and physical and biological parameters and pollutant content.

|                     | Cyp1A             |          | Vtg    |          |           |          | Zrp1      |          |           |          | ERa       |          |         |          |
|---------------------|-------------------|----------|--------|----------|-----------|----------|-----------|----------|-----------|----------|-----------|----------|---------|----------|
|                     | Males and females |          | Males  |          | Females   |          | Males     |          | Females   |          | Males     |          | Females |          |
|                     | $\rho$            | <i>n</i> | $\rho$ | <i>n</i> | $\rho$    | <i>n</i> | $\rho$    | <i>n</i> | $\rho$    | <i>n</i> | $\rho$    | <i>n</i> | $\rho$  | <i>n</i> |
| Cyp1A               | 1                 | 101      |        |          |           |          |           |          |           |          |           |          |         |          |
| Vtg                 | 0.334 *           | 39       | 1      | 39       | 1         | 51       |           |          |           |          |           |          |         |          |
| Zrp1                | -0.013            | 39       | 0.172  | 37       | 0.659 *** | 49       | 1         | 39       | 1         | 50       |           |          |         |          |
| ERa                 | -0.208            | 38       | 0.050  | 37       | -0.395    | 24       | 0.584 *** | 36       | 0.779 *** | 25       | 1         | 38       | 1       | 25       |
| Temperature         | -0.555 ***        | 101      | 0.041  | 39       | -0.171    | 51       | 0.150     | 39       | 0.026     | 50       | 0.125     | 38       | -0.020  | 25       |
| Condition factor    | -0.283 **         | 101      | 0.126  | 39       | -0.089    | 51       | -0.007    | 39       | -0.149    | 50       | -0.028    | 38       | 0.314   | 25       |
| Reproductive status | -0.094            | 94       | -0.102 | 34       | 0.669 *** | 49       | -0.364 *  | 34       | 0.787 *** | 48       | -0.107    | 35       | 0.243   | 25       |
| Age                 | 0.017             | 100      | -0.175 | 38       | 0.121     | 51       | 0.278     | 38       | 0.128     | 50       | 0.005     | 37       | -0.187  | 25       |
| a-HCH               | -0.323 **         | 96       | 0.333  | 35       | 0.153     | 50       | 0.244     | 35       | 0.180     | 49       | 0.226     | 36       | 0.152   | 25       |
| HCB                 | -0.108            | 98       | -0.013 | 37       | 0.285 *   | 50       | 0.211     | 37       | 0.376 **  | 49       | 0.590 *** | 38       | 0.267   | 25       |
| g-HCH               | 0.385 ***         | 98       | -0.175 | 37       | 0.078     | 50       | 0.066     | 37       | -0.041    | 49       | 0.274     | 38       | -0.054  | 25       |
| PCB28               | 0.385 ***         | 98       | 0.250  | 37       | 0.272     | 50       | -0.048    | 37       | 0.145     | 49       | 0.002     | 38       | -0.002  | 25       |
| PCB52               | 0.295 **          | 94       | -0.049 | 34       | 0.168     | 50       | 0.123     | 33       | 0.218     | 49       | 0.252     | 35       | -0.044  | 25       |
| PCB101              | 0.506 ***         | 95       | -0.013 | 35       | 0.111     | 50       | -0.017    | 34       | 0.162     | 49       | -0.013    | 35       | 0.106   | 25       |
| PCB118              | 0.432 ***         | 98       | 0.034  | 37       | 0.150     | 50       | 0.267     | 37       | -0.150    | 49       | 0.143     | 38       | -0.328  | 25       |
| PCB153              | 0.575 ***         | 98       | -0.191 | 37       | -0.024    | 50       | 0.019     | 37       | -0.245    | 49       | 0.005     | 38       | -0.219  | 25       |
| PCB138              | 0.579 ***         | 98       | -0.130 | 37       | -0.044    | 50       | 0.071     | 37       | -0.303 *  | 49       | 0.120     | 38       | -0.161  | 25       |
| PCB180              | 0.578 ***         | 98       | -0.153 | 37       | -0.021    | 50       | -0.095    | 37       | -0.265    | 49       | -0.157    | 38       | -0.387  | 25       |
| Sum PCB             | 0.633 ***         | 98       | -0.156 | 37       | 0.022     | 50       | 0.021     | 37       | -0.259    | 49       | 0.009     | 38       | -0.217  | 25       |
| pp-DDE              | 0.437 ***         | 98       | 0.141  | 37       | 0.054     | 50       | 0.150     | 37       | -0.177    | 49       | 0.043     | 38       | -0.210  | 25       |
| pp-DDT              | 0.428 ***         | 95       | 0.053  | 34       | 0.128     | 50       | 0.210     | 34       | -0.052    | 49       | 0.220     | 35       | -0.322  | 25       |
| SUM DDE             | 0.459 ***         | 98       | 0.137  | 37       | 0.050     | 50       | 0.141     | 37       | -0.191    | 49       | 0.057     | 38       | -0.215  | 25       |
| PC1                 | 0.583 ***         | 98       | -0.089 | 37       | 0.170     | 50       | 0.032     | 37       | -0.129    | 49       | 0.084     | 38       | -0.213  | 25       |
| PC2                 | -0.194            | 98       | 0.108  | 37       | 0.228     | 50       | 0.341 *   | 37       | 0.212     | 49       | 0.669 *** | 38       | 0.071   | 25       |

\*,  $p < 0.05$ ; \*\*,  $p < 0.01$ ; \*\*\*,  $p < 0.001$

PC1, PC2, principal components 1 and 2
